# Supplementary figures and images for: Disulfide bridge-dependent dimerization triggers FGF2 membrane translocation into the extracellular space
Source: eLife journal article supplement (doi:10.7554/elife.88579), 2023-05-31

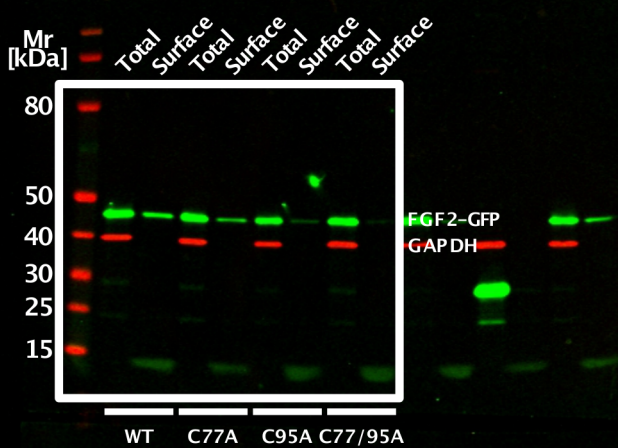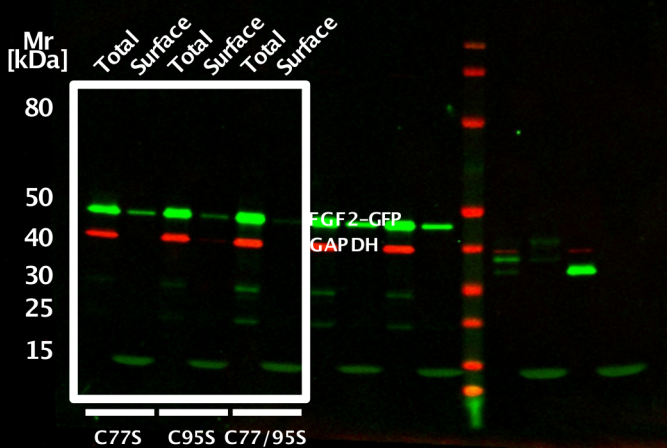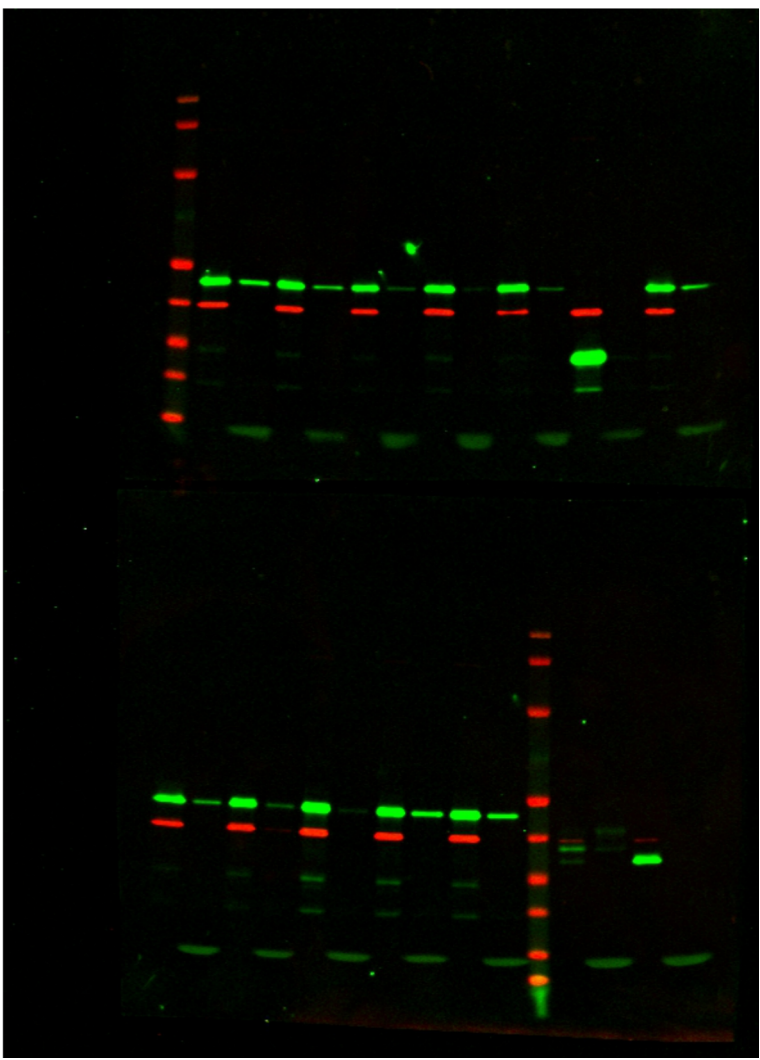

Supplement: fig1-data2 [file elife-88579-fig1-data2-v1.zip]

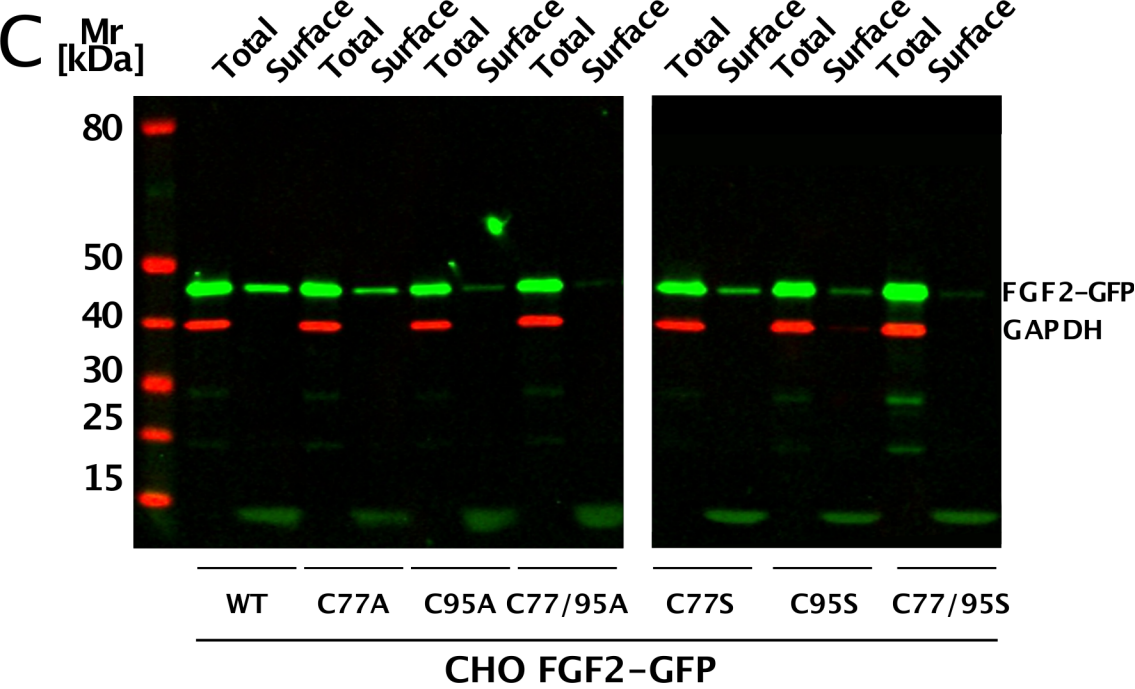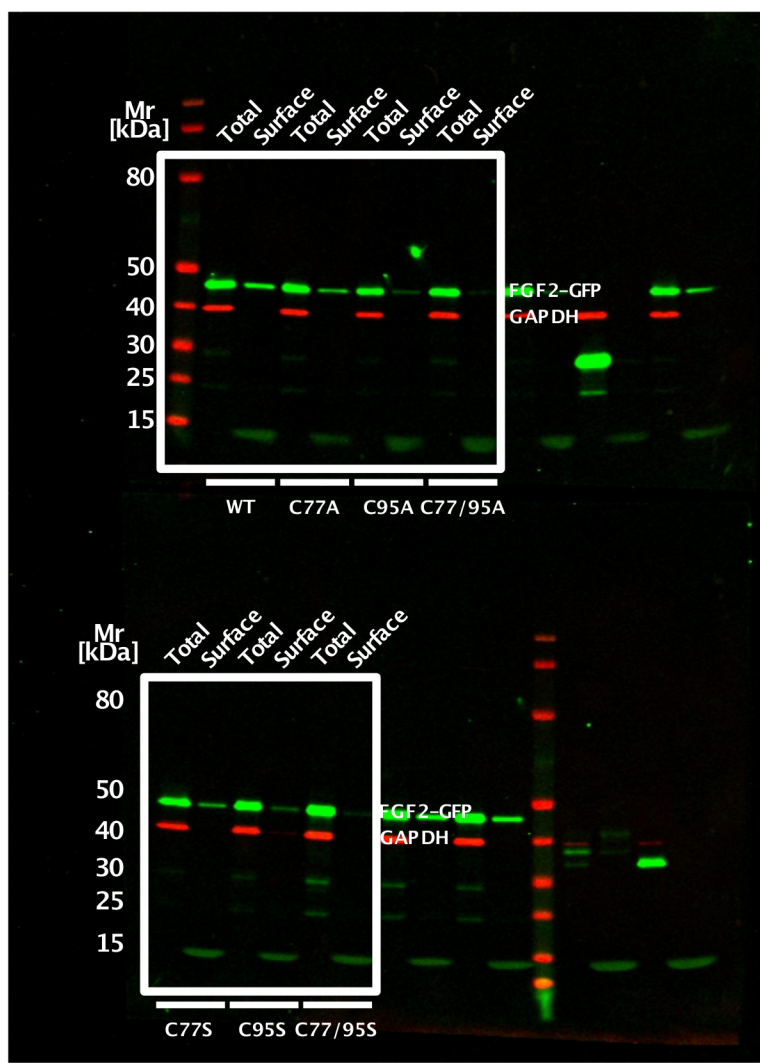

Supplement: fig1-data3 [file elife-88579-fig1-data3-v1.zip]

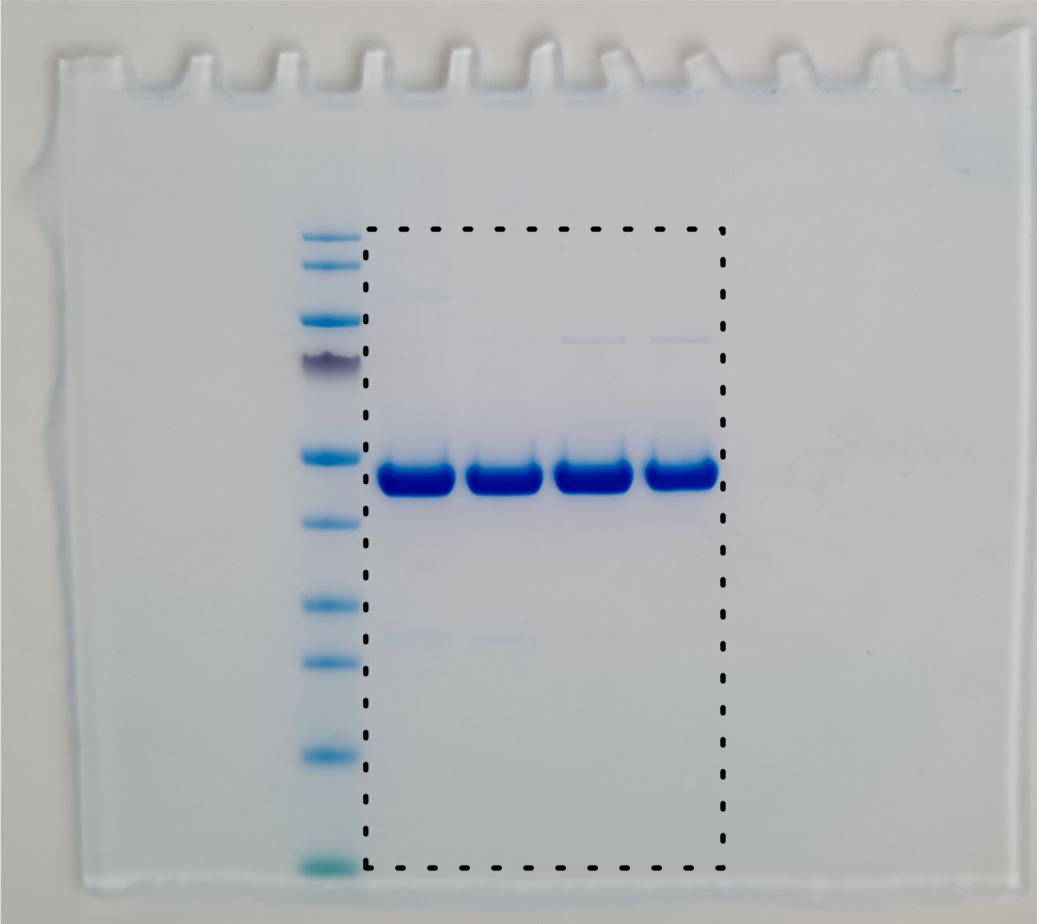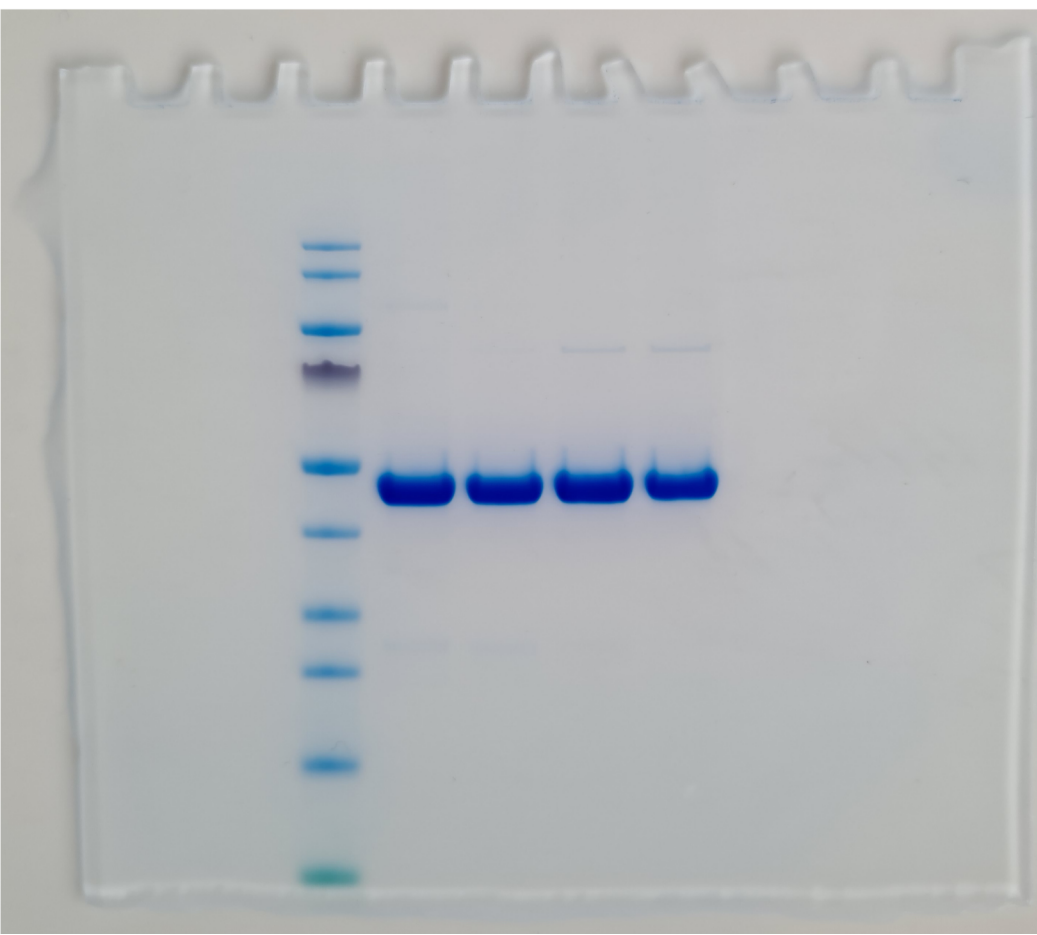

Supplement: fig2-data2 [file elife-88579-fig2-data2-v1.zip]

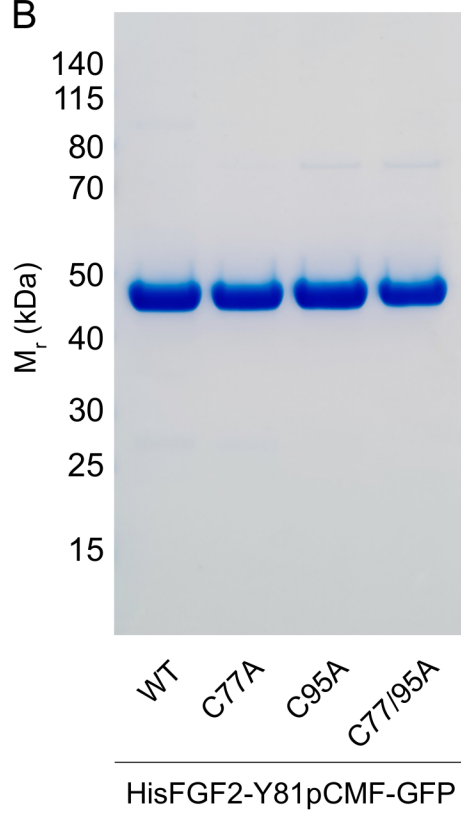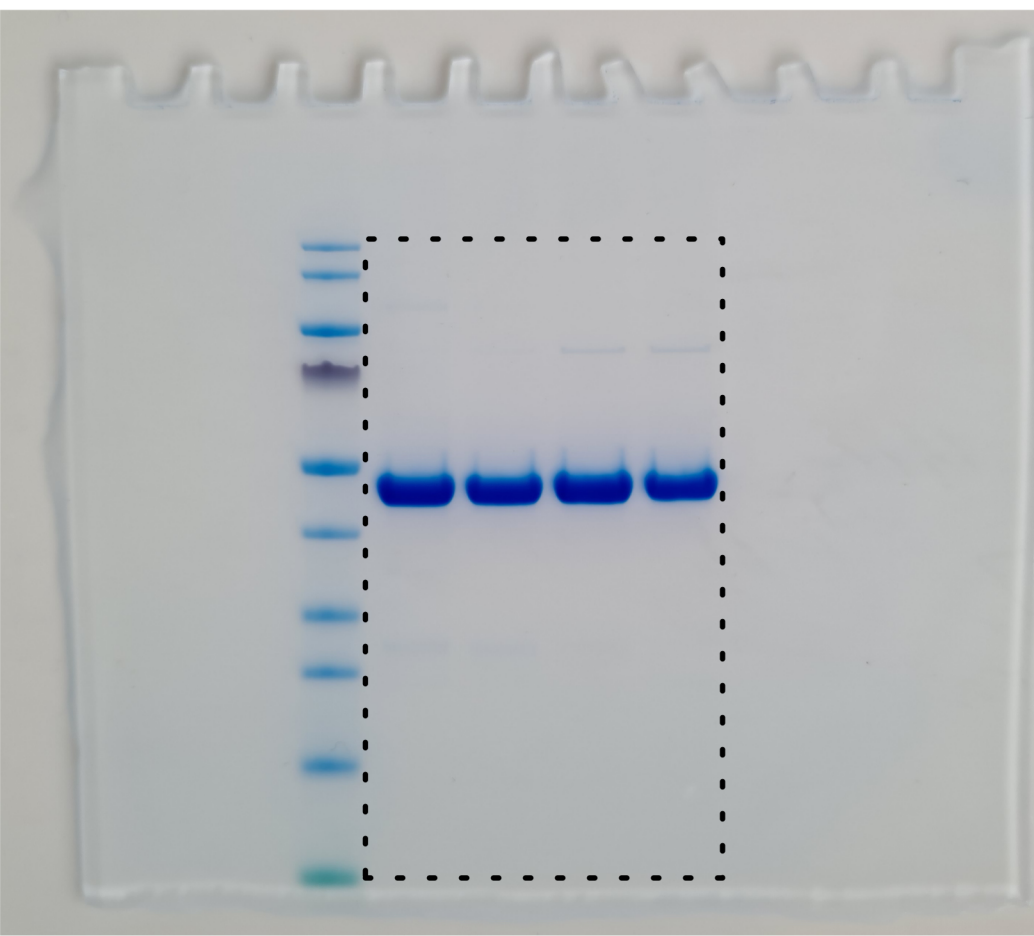

Supplement: fig2-data3 [file elife-88579-fig2-data3-v1.zip]

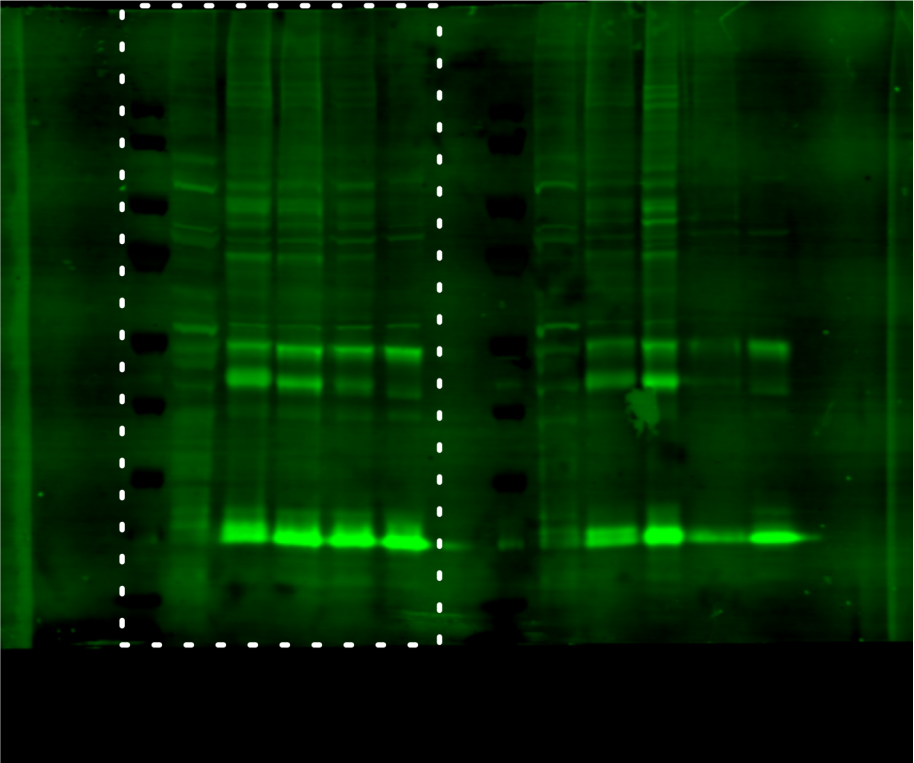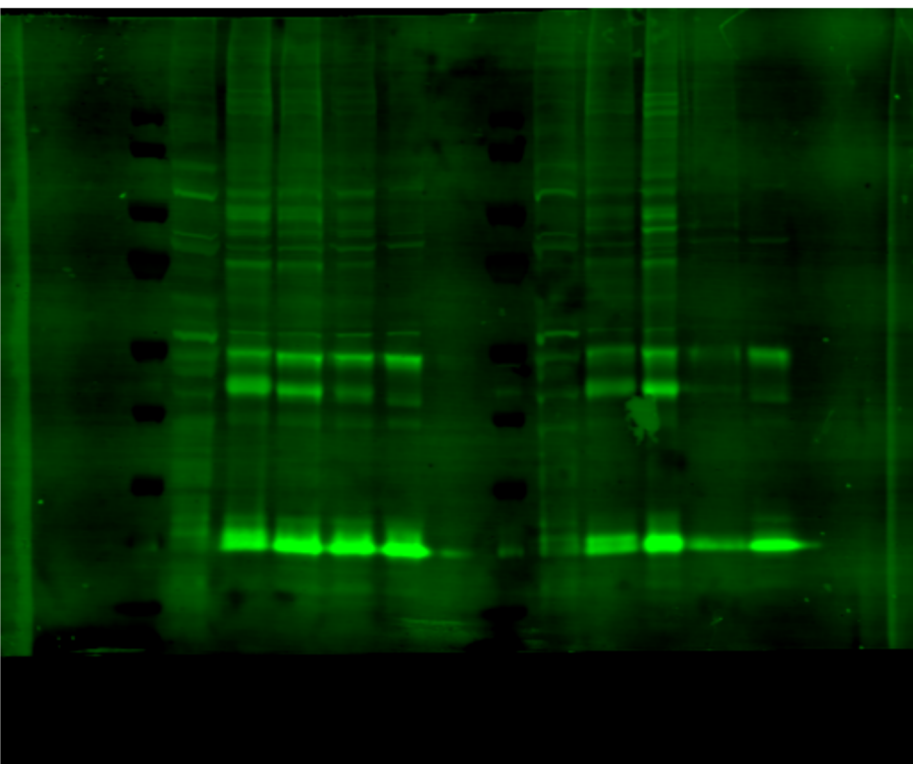

Supplement: fig3-data2 [file elife-88579-fig3-data2-v1.zip]

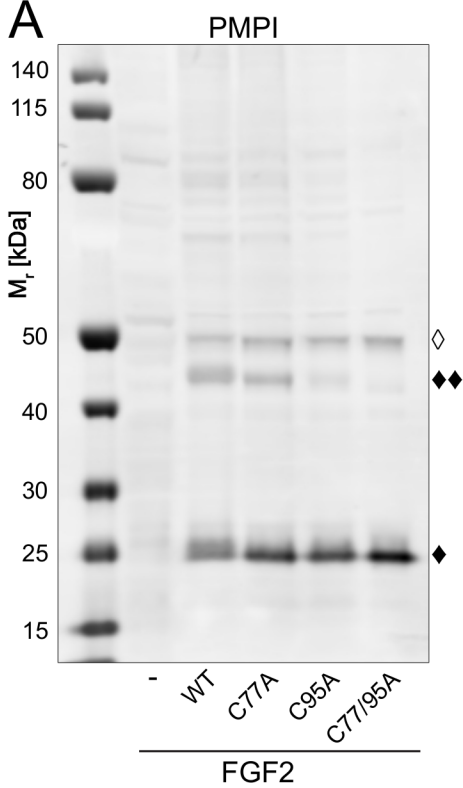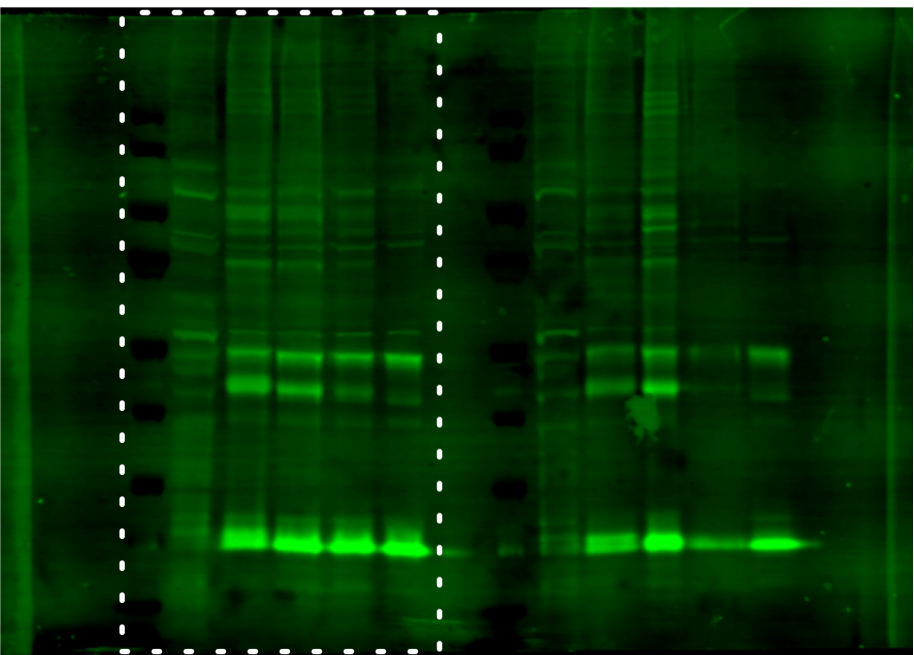

Supplement: fig3-data3 [file elife-88579-fig3-data3-v1.zip]

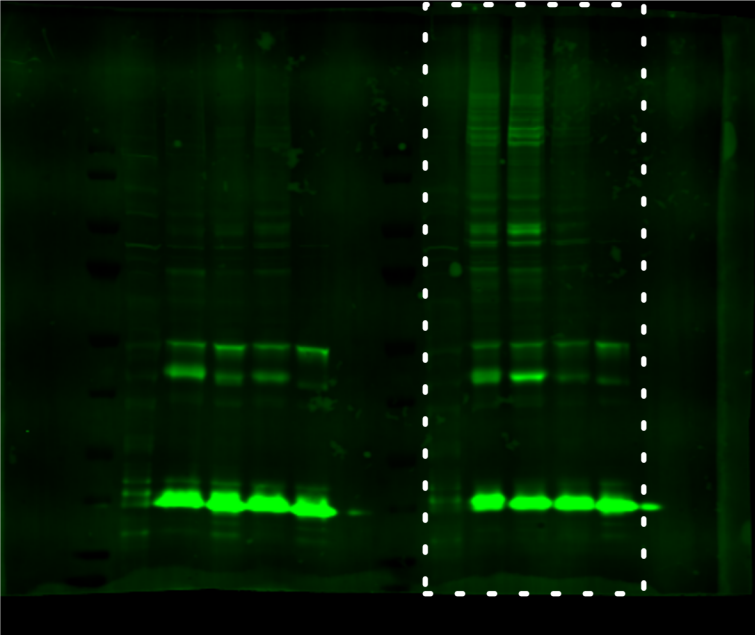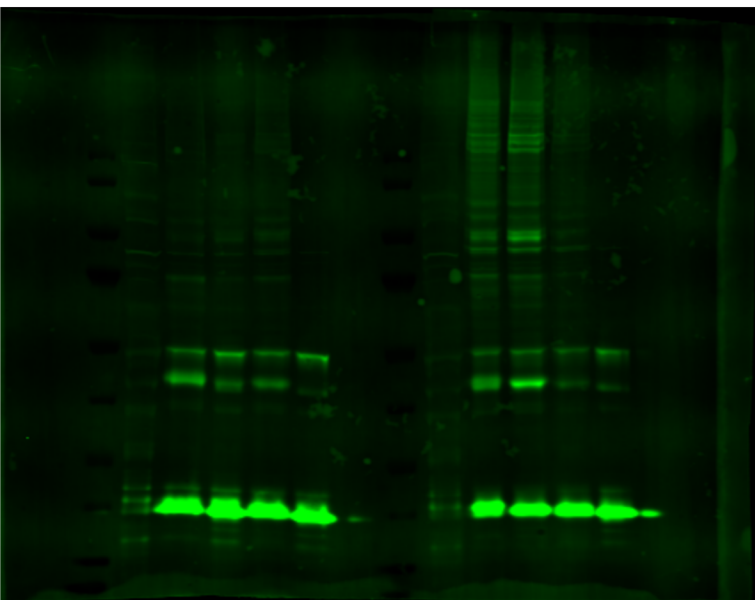

Supplement: fig3-data4 [file elife-88579-fig3-data4-v1.zip]

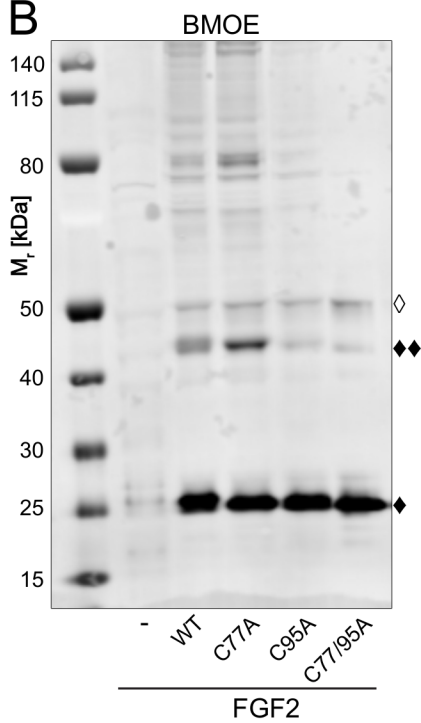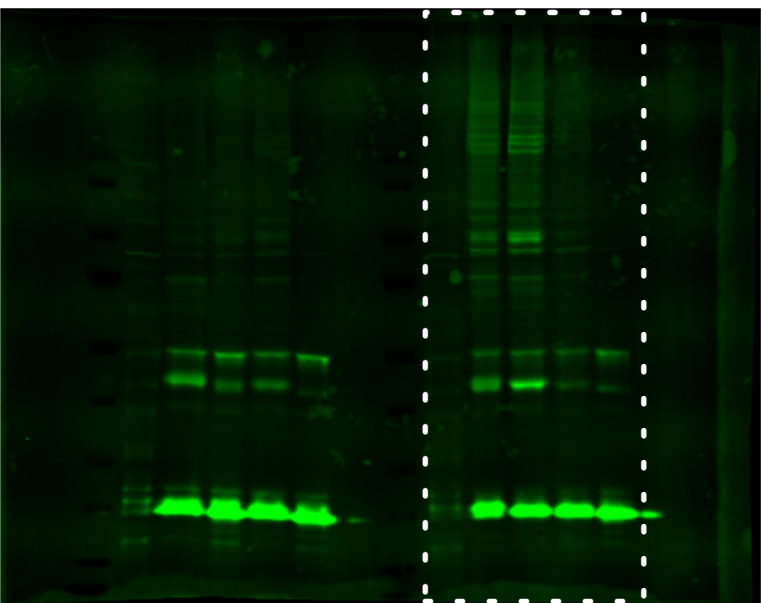

Supplement: fig3-data5 [file elife-88579-fig3-data5-v1.zip]

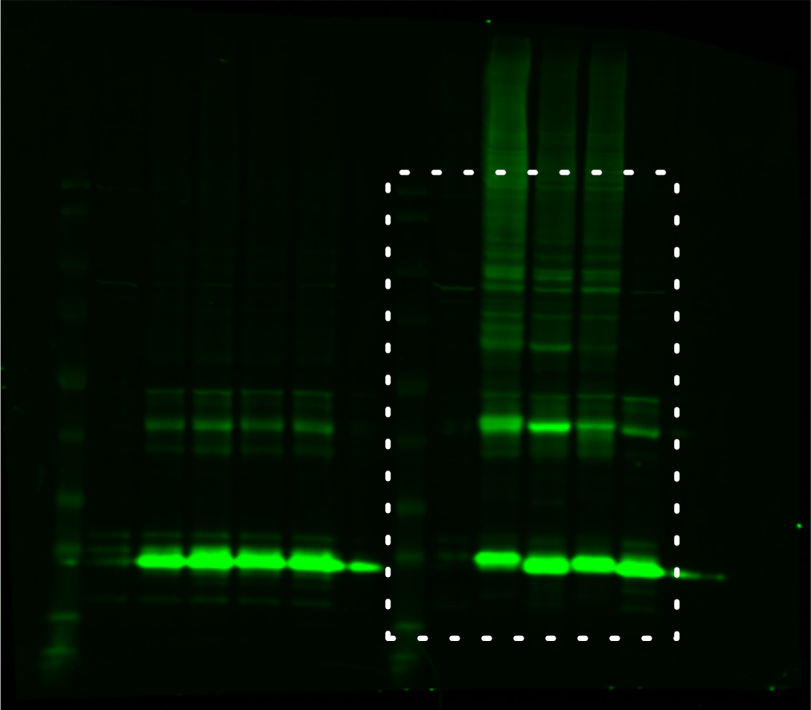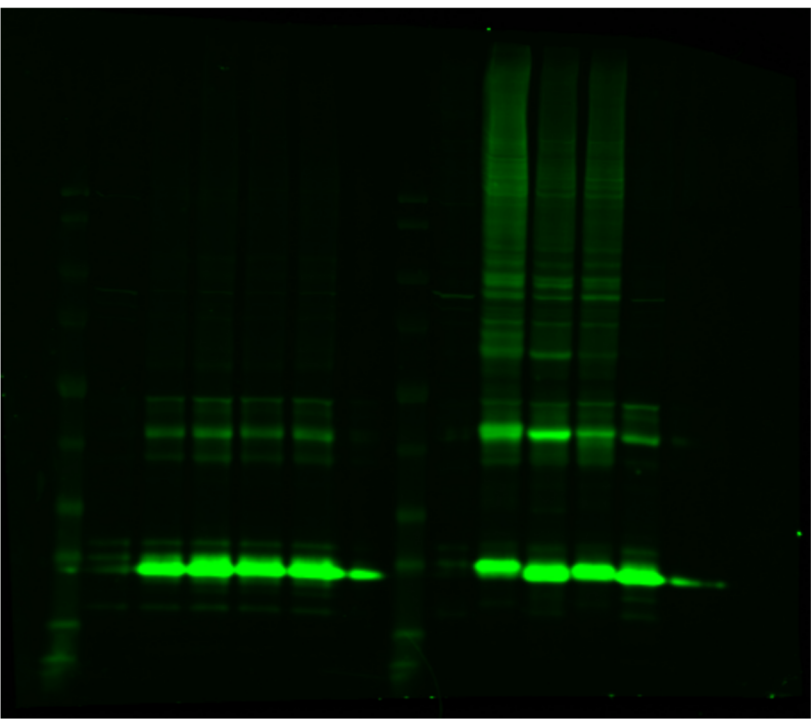

Supplement: fig3-data6 [file elife-88579-fig3-data6-v1.zip]

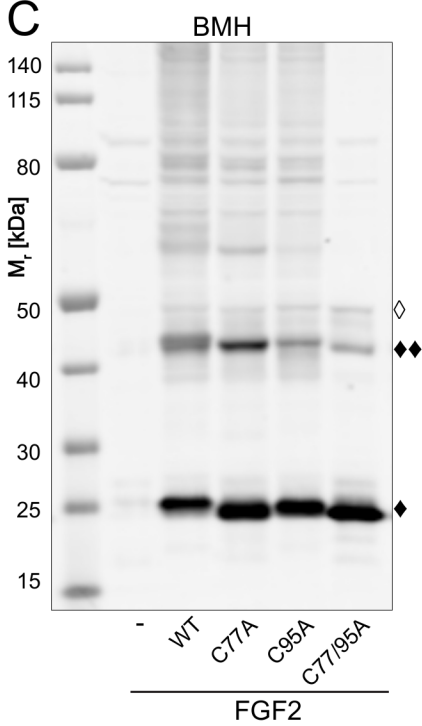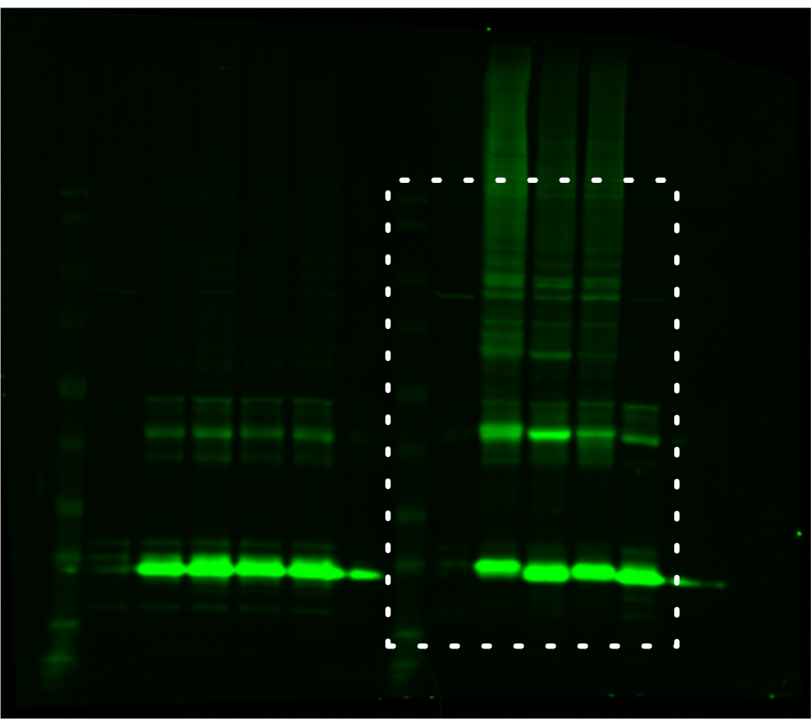

Supplement: fig3-data7 [file elife-88579-fig3-data7-v1.zip]

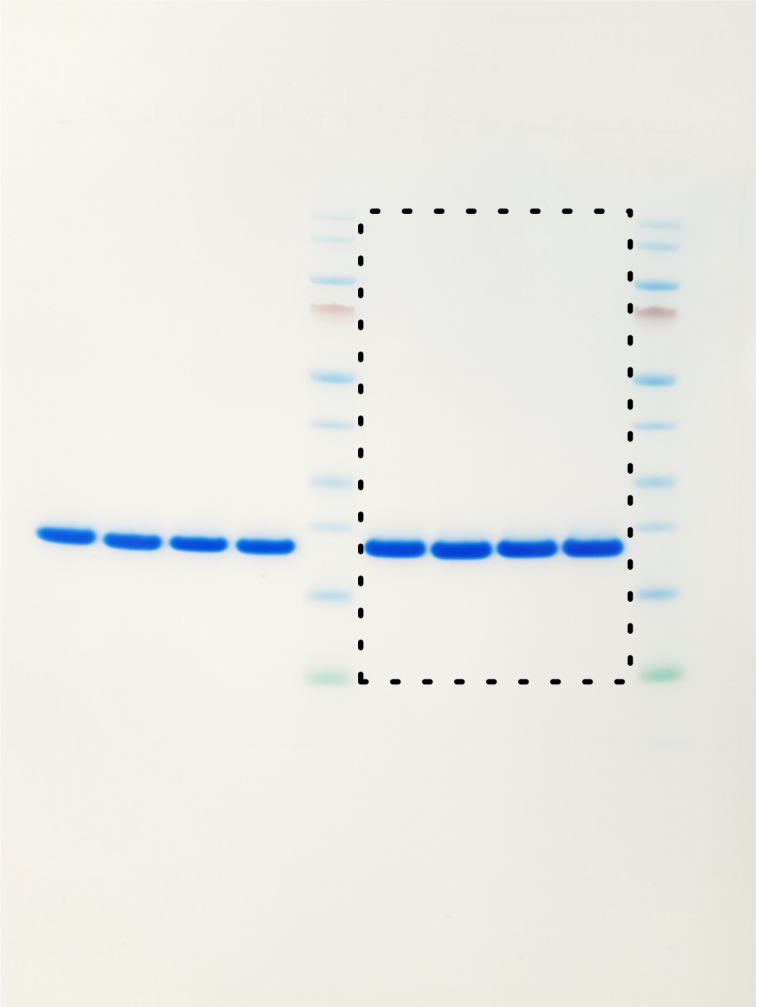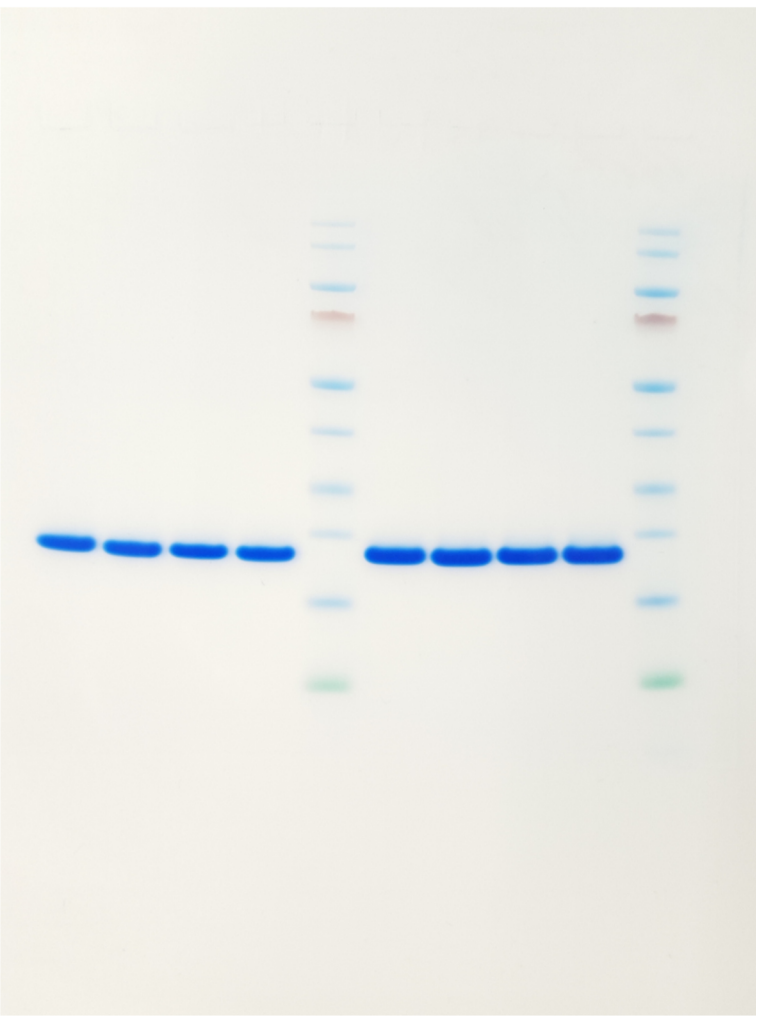

Supplement: fig4-data2 [file elife-88579-fig4-data2-v1.zip]

# B

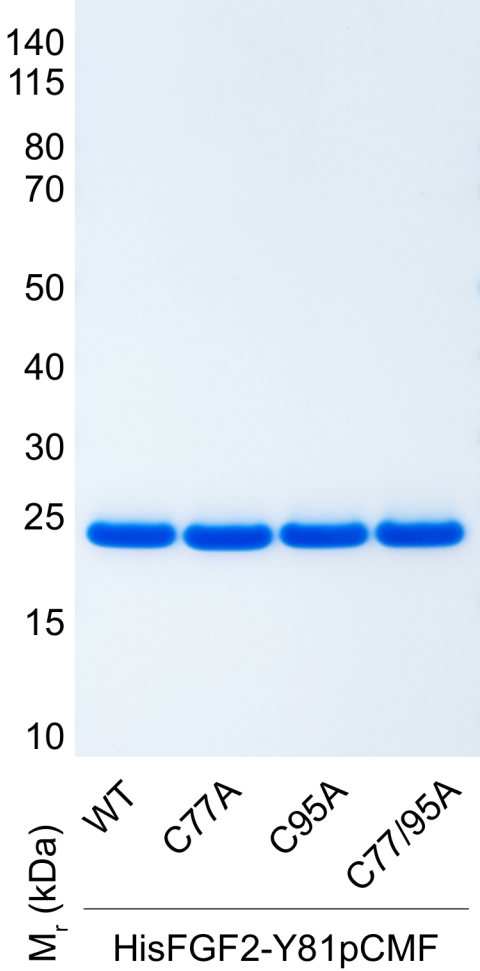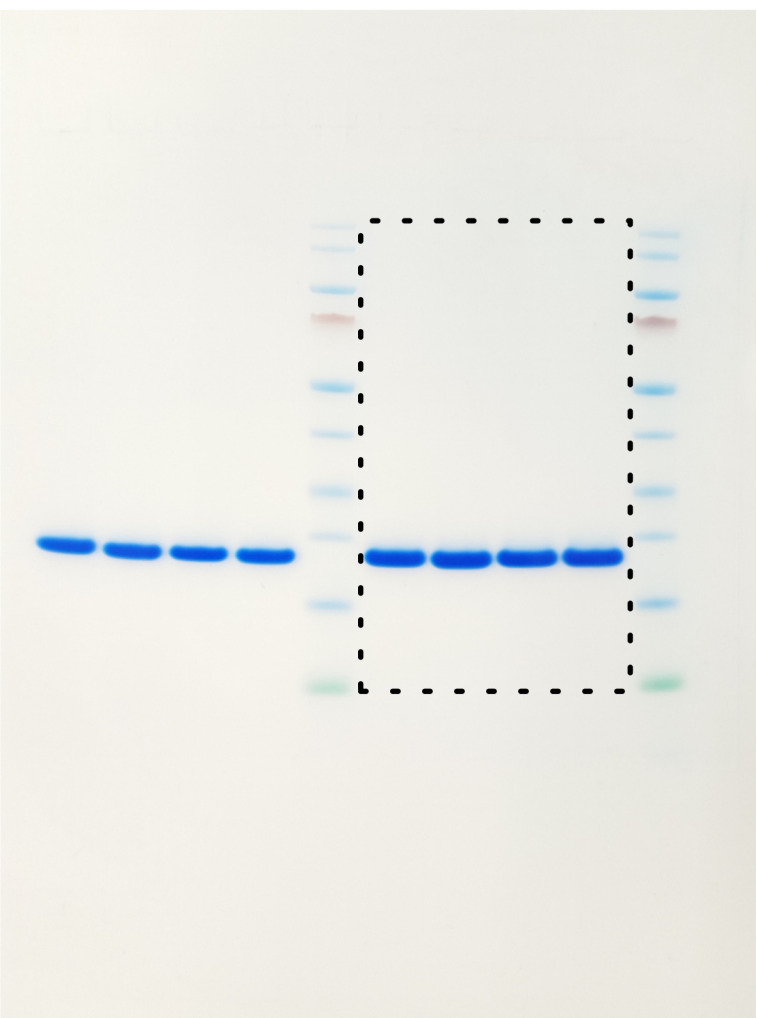

Supplement: fig4-data3 [file elife-88579-fig4-data3-v1.zip]

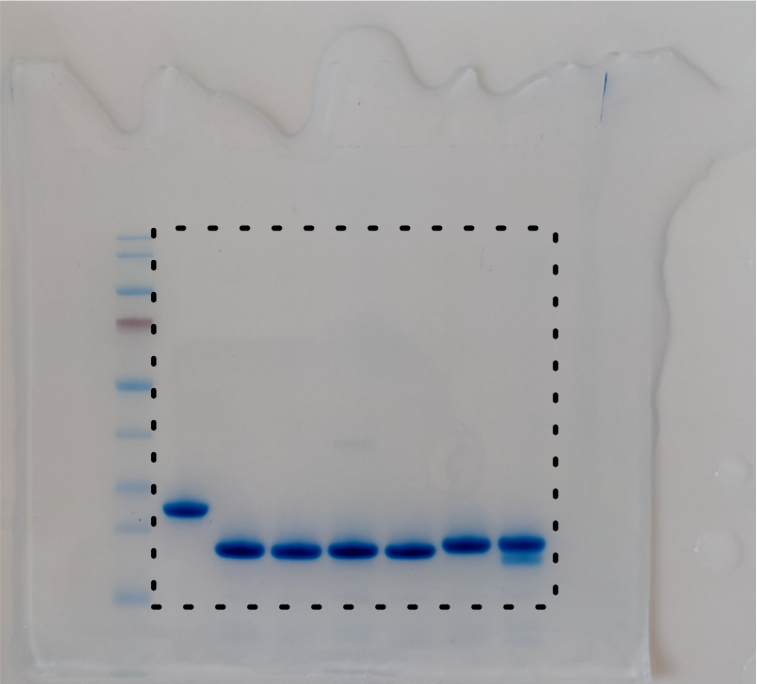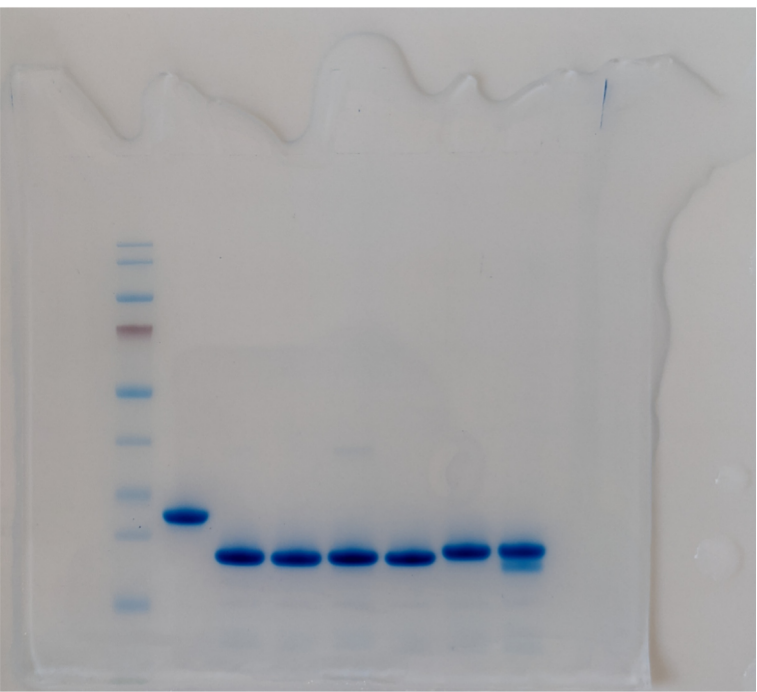

Supplement: fig7-data2 [file elife-88579-fig7-data2-v1.zip]

**D**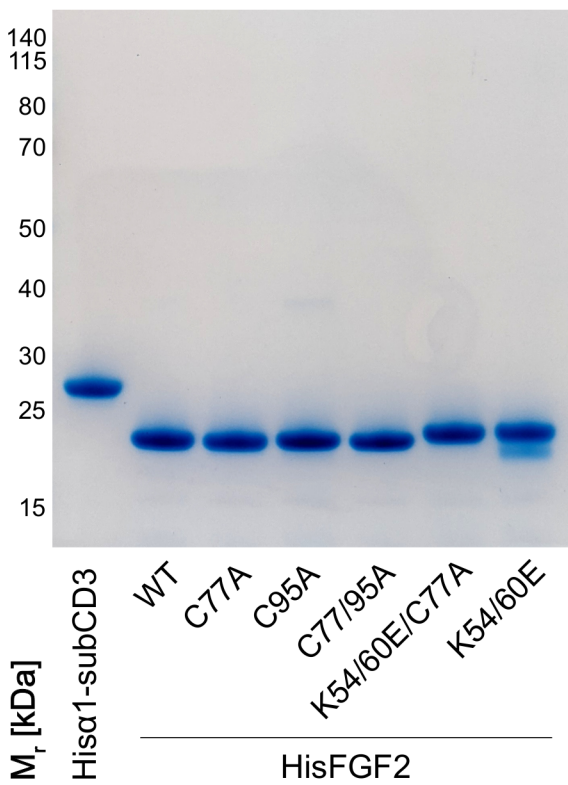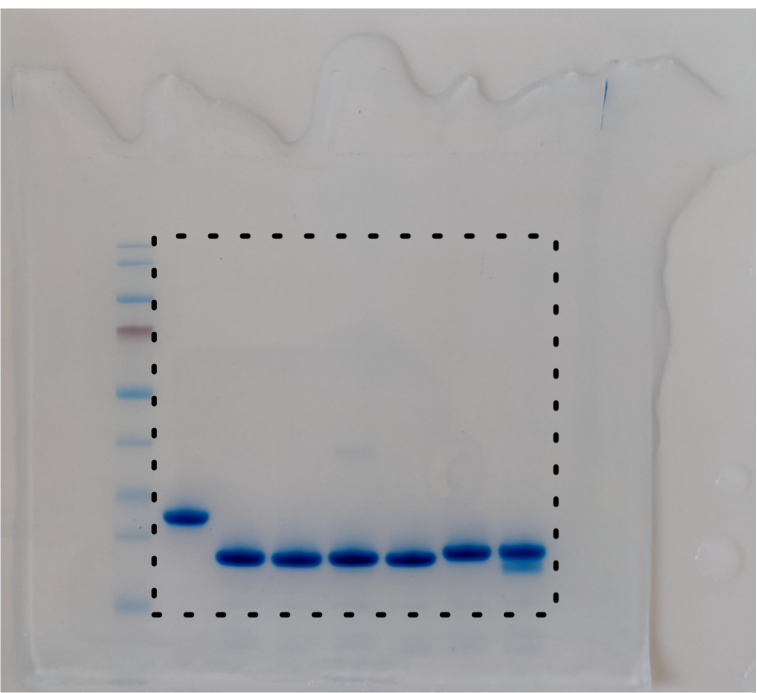

Supplement: fig7-data3 [file elife-88579-fig7-data3-v1.zip]
